# Supplementary material for: Anisotropic dissociation and spectral response of 1-Bromo-4-chlorobenzene under static directional electric fields
Source: publisher site journal article supplement (doi:10.1515/phys-2025-0250), 2025-01-01
Supplement: Supplementary file 1 [file j_phys-2025-0250_suppl_001.docx]

**Supplementary Materials**

**S1.** The variation in C–Br and C–Cl bond lengths (Å) of the C6H4BrCl molecule under different external electric fields was calculated using the B3LYP/def2-TZVP basis set.

| F/a.u. | -0.025 | -0.020 | -0.015 | -0.010 | -0.005 |
| --- | --- | --- | --- | --- | --- |
| C-Br/Å | 1.86872 | 1.87556 | 1.88229 | 1.89038 | 1.89963 |
| C-Cl/Å | 1.82801 | 1.80386 | 1.78387 | 1.76883 | 1.75573 |

| F/a.u. | 0 | 0.005 | 0.010 | 0.015 | 0.020 | 0.025 |
| --- | --- | --- | --- | --- | --- | --- |
| C-Br/Å | 1.90883 | 1.92045 | 1.93372 | 1.95085 | 1.97225 | 2.00400 |
| C-Cl/Å | 1.74400 | 1.73387 | 1.72356 | 1.71439 | 1.70539 | 1.69744 |

.

**S2.** The changes in the potential energy curves of the C–Cl and C–Br bonds in the C6H4BrCl molecule under different external electric fields were calculated using the B3LYP/def2-TZVP basis set.

.

**S3.** The dissociation energies of the C6H4BrCl molecule calculated using the B3LYP/6-311G(d,p) and B3LYP/def2-TZVP basis sets.

| Basis set | Br-BDE | Cl-BDE |
| --- | --- | --- |
| B3LYP/6-311（d,p） | 79.28444701 | 90.93023541 |
| B3LYP/def2-TZVP | 80.2410586 | 48.6477513 |

**S4.** The energy gap and its variation of the C6H4BrCl molecule under different external electric fields, calculated using the long-range corrected CAM-B3LYP functional and the 6-311G(d,p) basis set

| F/a.u. | -0.025 | -0.020 | -0.015 | -0.010 | -0.005 |
| --- | --- | --- | --- | --- | --- |
| EL | -0.06201 | -0.03345 | -0.00757 | -0.0014 | -0.00427 |
| EH | -0.2917 | -0.29677 | -0.30154 | -0.30515 | -0.30666 |
| EG | 6.2501865 | 7.165305848 | 7.999335258 | 8.26546275 | 8.228455246 |

| F/a.u. | 0 | 0.005 | 0.010 | 0.015 | 0.020 | 0.025 |
| --- | --- | --- | --- | --- | --- | --- |
| EL | 0.00981 | 0.01537 | 0.01294 | -0.00033 | -0.01458 | -0.02999 |
| EH | -0.3051 | -0.30008 | -0.29182 | -0.28117 | -0.26886 | -0.25575 |
| EG | 8.569142 | 8.58383613 | 8.292946264 | 7.642049576 | 6.919314792 | 6.143245664 |

**S5.** The excitation energies of the C6H4BrCl molecule under different external electric fields, calculated using TDDFT with the long-range corrected functional (CAM-B3LYP) to simulate GW-level effects.

| F  a.u. | Excited State | | | | | | | | | |
| --- | --- | --- | --- | --- | --- | --- | --- | --- | --- | --- |
|  | 1 | 2 | 3 | 4 | 5 | 6 | 7 | 8 | 9 |
| 0 | E/eV | 5.2639 | 5.7280 | 5.8193 | 6.7073 | 6.7411 | 6.9181 | 6.9674 | 7.0101 | 7.0745 |
| 0.005 | E/eV | 5.2266 | 5.7438 | 5.7905 | 6.5144 | 6.5841 | 6.6253 | 6.7936 | 6.8564 | 6.9052 |
| 0.010 | E/eV | 5.1487 | 5.5877 | 5.7505 | 6.1576 | 6.2447 | 6.3757 | 6.3917 | 6.5851 | 6.8109 |
| 0.015 | E/eV | 5.0152 | 5.3536 | 5.5700 | 5.6769 | 5.8844 | 5.9365 | 6.1558 | 6.3558 | 6.7069 |
| 0.020 | E/eV | 4.8084 | 5.0509 | 5.1648 | 5.1836 | 5.4123 | 5.6342 | 5.8596 | 6.1557 | 6.4063 |
| 0.025 | E/eV | 5.2453 | 5.2627 | 5.7977 | 6.1300 | 6.5603 | 6.8510 | 6.8852 | 6.9396 | 7.0388 |
